# Supplementary material for: The effect of body size on the wing movements of pteropodid bats, with insights into thrust and lift production
Source: Oxford University Press journal article supplement (doi:10.1242/jeb.043091), 2010-11-12
Supplement: jeb043091supptable1.pdf [file jeb043091supptable1.pdf]

[illegible]
