# Supplementary material for: The effect of body size on the wing movements of pteropodid bats, with insights into thrust and lift production
Source: Oxford University Press journal article supplement (doi:10.1242/jeb.043091), 2010-11-12
Supplement: jeb043091supptable2.pdf [file jeb043091supptable2.pdf]

Table S2A. Changes in wing kinematics with increases in  $V_{\text{horiz}}$  with the influence of  $A_{\text{horiz}}$  and  $A_{\text{vert}}$  held constant

| Species                                    | <i>Cynopterus<br/>brachyotis</i><br>(d.f.=17) | <i>Rousettus<br/>aegyptiacus</i><br>(d.f.=9) | <i>Pteropus<br/>pumilus</i><br>(d.f.=17) | <i>Eidolon<br/>helvum</i><br>(d.f.=17) | <i>Pteropus<br/>hypomelanus</i><br>(d.f.=17) | <i>Pteropus<br/>vampyrus</i><br>(d.f.=17) |
|--------------------------------------------|-----------------------------------------------|----------------------------------------------|------------------------------------------|----------------------------------------|----------------------------------------------|-------------------------------------------|
| Maximum wingspan<br>( $b_{\text{max}}$ )   | Decrease<br>$t=-2.51$<br>$P<0.034$            | $t=0.07$<br>$P=0.95$                         | $t=1.35$<br>$P=0.20$                     | $t=1.30$<br>$P=0.21$                   | $t=1.06$<br>$P=0.30$                         | $t=-0.20$<br>$P=0.85$                     |
| Minimum wingspan<br>( $b_{\text{min}}$ )   | Decrease<br>$t=-2.62$<br>$P=0.0178$           | $t=1.96$<br>$P=0.08$                         | $t=0.96$<br>$P=0.35$                     | Increase<br>$t=3.93$<br>$P=0.0011$     | Increase<br>$t=-0.49$<br>$P=0.63$            | Increase<br>$t=2.69$<br>$P=0.019$         |
| Wingbeat<br>period ( $T$ )                 | $t=-0.48$<br>$P=0.64$                         | $t=2.00$<br>$P=0.08$                         | Increase<br>$t=4.09$<br>$P<0.001$        | Increase<br>$t=4.80$<br>$P<0.001$      | Increase<br>$t=3.43$<br>$P<0.01$             | $t=1.28$<br>$P=0.22$                      |
| Downstroke<br>period ( $T_{\text{down}}$ ) | $t=-1.37$<br>$P=0.19$                         | $t=2.36$<br>$P=0.04$                         | Increase<br>$t=5.07$<br>$P<0.0001$       | Increase<br>$t=3.71$<br>$P<0.01$       | Increase<br>$t=4.00$<br>$P<0.001$            | $t=1.35$<br>$P=0.20$                      |
| Downstroke<br>ratio ( $\tau$ )             | $t=-1.42$<br>$P=0.18$                         | $t=1.60$<br>$P=0.14$                         | Increase<br>$t=3.57$<br>$P<0.01$         | $t=1.28$<br>$P=0.22$                   | Increase<br>$t=3.10$<br>$P<0.01$             | $t=1.12$<br>$P=0.28$                      |
| Wing stroke<br>amplitude ( $\phi$ )        | $t=1.40$<br>$P=0.18$                          | $t=-0.02$<br>$P=0.98$                        | $t=1.95$<br>$P=0.07$                     | $t=-0.11$<br>$P=0.91$                  | $t=0.87$<br>$P=0.40$                         | $t=-0.81$<br>$P=0.43$                     |
| Stroke plane<br>angle ( $\beta$ )          | Decrease<br>$t=-5.61$<br>$P<0.0001$           | Decrease<br>$t=-6.36$<br>$P<0.001$           | Decrease<br>$t=-2.38$<br>$P<0.034$       | Decrease<br>$t=-4.08$<br>$P<0.001$     | Decrease<br>$t=-2.93$<br>$P<0.01$            | $t=-1.84$<br>$P=0.09$                     |
| Angle of<br>attack ( $\alpha$ )            | Decrease<br>$t=-9.36$<br>$P<0.0001$           | $t=-1.04$<br>$P=0.32$                        | Decrease<br>$t=-3.62$<br>$P<0.01$        | $t=-1.81$<br>$P=0.09$                  | $t=-1.22$<br>$P=0.24$                        | Decrease<br>$t=-4.08$<br>$P<0.01$         |
| $\alpha_1$                                 | Decrease<br>$t=-4.64$<br>$P<0.001$            | $t=-1.33$<br>$P=0.22$                        | Decrease<br>$t=-2.55$<br>$P<0.034$       | $t=-2.16$<br>$P=0.05$                  | $t=1.03$<br>$P=0.32$                         | $t=-1.49$<br>$P=0.16$                     |
| $\alpha_2$                                 | $t=-0.43$<br>$P=0.67$                         | $t=0.24$<br>$P=0.81$                         | $t=0.20$<br>$P=0.85$                     | $t=0.24$<br>$P=0.81$                   | Decrease<br>$t=-2.43$<br>$P<0.034$           | Decrease<br>$t=-2.68$<br>$P<0.034$        |
| Wing camber                                | Decrease<br>$t=-5.56$<br>$P<0.0001$           | Decrease<br>$t=-3.86$<br>$P<0.01$            | $t=-1.88$<br>$P=0.08$                    | Decrease<br>$t=-2.42$<br>$P<0.034$     | Decrease<br>$t=-2.63$<br>$P<0.034$           | $t=-0.65$<br>$P=0.53$                     |
| Strouhal number ( $St$ )                   | Decrease<br>$t=-5.97$<br>$P<0.0001$           | Decrease<br>$t=-4.37$<br>$P<0.01$            | Decrease<br>$t=-4.82$<br>$P<0.001$       | Decrease<br>$t=-8.59$<br>$P<0.0001$    | Decrease<br>$t=-5.84$<br>$P<0.0001$          | Decrease<br>$t=-4.97$<br>$P<0.001$        |
| Lift coefficient ( $C_L$ )                 | Decrease<br>$t=-11.50$<br>$P<0.0001$          | Decrease<br>$t=-3.69$<br>$P<0.01$            | Decrease<br>$t=-3.64$<br>$P<0.01$        | Decrease<br>$t=-4.00$<br>$P<0.001$     | Decrease<br>$t=-4.61$<br>$P<0.001$           | $t=-1.75$<br>$P=0.10$                     |

The  $t$  statistic and two-tailed  $P$ -value for the partial regression slope are shown. Where  $P=0.034$ , it is noted whether the significant trend is an increase or decrease. That alpha level was chosen as a threshold for rejection of the null hypothesis to account for the increased Type I error rate from multiple tests on correlated data, as explained in the methods.

Table S2B. Changes in wing kinematics with increases in  $A_{\text{horiz}}$ , with the influence of  $V_{\text{horiz}}$  and  $A_{\text{vert}}$  held constant

|                                            | <i>Cynopterus<br/>brachyotis</i><br>(d.f.=17) | <i>Rousettus<br/>aegyptiacus</i><br>(d.f.=9) | <i>Pteropus<br/>pumilus</i><br>(d.f.=17) | <i>Eidolon<br/>helvum</i><br>(d.f.=17) | <i>Pteropus<br/>hypomelanus</i><br>(d.f.=17) | <i>Pteropus<br/>vampyrus</i><br>(d.f.=17) |
|--------------------------------------------|-----------------------------------------------|----------------------------------------------|------------------------------------------|----------------------------------------|----------------------------------------------|-------------------------------------------|
| Maximum wingspan<br>( $b_{\text{max}}$ )   | Increase<br>$t=4.17$<br>$P<0.001$             | $t=0.01$<br>$P=0.99$                         | $t=0.90$<br>$P=0.38$                     | $t=-1.12$<br>$P=0.28$                  | Increase<br>$t=3.19$<br>$P<0.01$             | $t=-1.41$<br>$P=0.18$                     |
| Minimum Wingspan<br>( $b_{\text{min}}$ )   | $t=-0.89$<br>$P=0.38$                         | $t=-0.25$<br>$P=0.81$                        | Decrease<br>$t=-3.29$<br>$P<0.01$        | $t=-1.43$<br>$P=0.17$                  | $t=-1.59$<br>$P=0.13$                        | $t=0.13$<br>$P=0.90$                      |
| Wingbeat<br>period ( $T$ )                 | $t=-1.63$<br>$P=0.12$                         | $t=-1.18$<br>$P=0.27$                        | $t=-0.39$<br>$P=0.70$                    | $t=-0.56$<br>$P=0.58$                  | $t=-1.01$<br>$P=0.33$                        | $t=0.83$<br>$P=0.42$                      |
| Downstroke<br>period ( $T_{\text{down}}$ ) | $t=-0.81$<br>$P=0.43$                         | $t=-0.54$<br>$P=0.60$                        | $t=-1.67$<br>$P=0.11$                    | $t=-1.77$<br>$P=0.10$                  | $t=-1.82$<br>$P=0.09$                        | $t=0.61$<br>$P=0.55$                      |
| Downstroke Ratio ( $\tau$ )                | $t=0.43$<br>$P=0.67$                          | $t=0.26$<br>$P=0.80$                         | $t=-2.04$<br>$P=0.06$                    | $t=-2.17$<br>$P=0.04$                  | $t=-2.27$<br>$P=0.04$                        | $t=0.14$<br>$P=0.89$                      |
| Wing stroke<br>amplitude ( $\phi$ )        | $t=1.49$<br>$P=0.16$                          | $t=-0.22$<br>$P=0.83$                        | Increase<br>$t=4.44$<br>$P<0.001$        | $t=0.05$<br>$P=0.96$                   | $t=0.01$<br>$P=1.00$                         | $t=0.90$<br>$P=0.38$                      |
| Stroke plane<br>angle ( $\beta$ )          | Decrease<br>$t=-3.96$<br>$P<0.01$             | Decrease<br>$t=-3.85$<br>$P<0.01$            | Decrease<br>$t=-5.09$<br>$P<0.0001$      | Decrease<br>$t=-3.06$<br>$P<0.01$      | $t=-2.21$<br>$P=0.04$                        | $t=-1.43$<br>$P=0.18$                     |
| Angle of<br>attack ( $\alpha$ )            | $t=-1.07$<br>$P=0.30$                         | $t=1.71$<br>$P=0.12$                         | $t=-1.78$<br>$P=0.09$                    | $t=-0.13$<br>$P=0.90$                  | Increase<br>$t=2.38$<br>$P<0.034$            | $t=1.03$<br>$P=0.32$                      |
| $\alpha_1$                                 | Decrease<br>$t=-4.10$<br>$P<0.001$            | $t=-2.10$<br>$P=0.07$                        | Decrease<br>$t=-5.02$<br>$P<0.001$       | Decrease<br>$t=-2.77$<br>$P<0.034$     | $t=-0.26$<br>$P=0.80$                        | $t=-2.05$<br>$P=0.06$                     |
| $\alpha_2$                                 | Increase<br>$t=3.99$<br>$P<0.001$             | Increase<br>$t=2.92$<br>$P<0.034$            | Increase<br>$t=3.51$<br>$P<0.01$         | Increase<br>$t=2.55$<br>$P<0.034$      | Increase<br>$t=2.57$<br>$P<0.034$            | Increase<br>$t=3.48$<br>$P<0.01$          |
| Wing camber                                | $t=0.85$<br>$P=0.41$                          | $t=-1.95$<br>$P=0.08$                        | $t=0.33$<br>$P=0.74$                     | $t=-0.56$<br>$P=0.58$                  | $t=1.62$<br>$P=0.12$                         | $t=0.75$<br>$P=0.46$                      |
| Strouhal number ( $S$ )                    | Increase<br>$t=2.94$<br>$P<0.01$              | $t=1.94$<br>$P=0.08$                         | Increase<br>$t=5.58$<br>$P<0.0001$       | Increase<br>$t=3.92$<br>$P<0.01$       | $t=1.48$<br>$P=0.16$                         | $t=2.12$<br>$P=0.05$                      |
| Lift coefficient ( $C_L$ )                 | $t=-1.18$<br>$P=0.26$                         | $t=-1.96$<br>$P=0.08$                        | $t=-1.78$<br>$P=0.09$                    | $t=0.05$<br>$P=0.96$                   | $t=0.46$<br>$P=0.65$                         | Increase<br>$t=2.57$<br>$P<0.034$         |

Table S2C. Changes in wing kinematics with Increases in  $A_{\text{vert}}$  with the influence of  $V_{\text{horiz}}$  and  $A_{\text{horiz}}$  held constant

|                                            | <i>Cynopterus<br/>brachyotis</i><br>(d.f.=17) | <i>Rousettus<br/>aegyptiacus</i><br>(d.f.=9) | <i>Pteropus<br/>pumilus</i><br>(d.f.=17) | <i>Eidolon<br/>helvum</i><br>(d.f.=17) | <i>Pteropus<br/>hypomelanus</i><br>(d.f.=17) | <i>Pteropus<br/>vampyrus</i><br>(d.f.=17) |
|--------------------------------------------|-----------------------------------------------|----------------------------------------------|------------------------------------------|----------------------------------------|----------------------------------------------|-------------------------------------------|
| Maximum wingspan<br>( $b_{\text{max}}$ )   | Increase<br>$t=4.18$<br>$P<0.001$             | $t=0.44$<br>$P=0.67$                         | $t=2.04$<br>$P=0.06$                     | $t=1.10$<br>$P=0.29$                   | Increase<br>$t=3.20$<br>$P<0.01$             | $t=-0.97$<br>$P=0.35$                     |
| Minimum wingspan<br>( $b_{\text{min}}$ )   | $t=0.31$<br>$P=0.76$                          | $t=0.76$<br>$P=0.47$                         | $t=-0.64$<br>$P=0.53$                    | $t=-1.17$<br>$P=0.26$                  | $t=0.09$<br>$P=0.93$                         | $t=0.14$<br>$P=0.89$                      |
| Wingbeat<br>period ( $T$ )                 | $t=-2.19$<br>$P=0.04$                         | Decrease<br>$t=-4.24$<br>$P<0.01$            | $t=-0.26$<br>$P=0.80$                    | $t=-0.93$<br>$P=0.37$                  | $t=-1.30$<br>$P=0.21$                        | $t=0.29$<br>$P=0.77$                      |
| Downstroke<br>period ( $T_{\text{down}}$ ) | $t=-1.26$<br>$P=0.23$                         | $t=-1.12$<br>$P=0.29$                        | $t=-0.31$<br>$P=0.76$                    | $t=-1.47$<br>$P=0.16$                  | $t=-0.44$<br>$P=0.66$                        | $t=0.68$<br>$P=0.51$                      |
| Downstroke ratio ( $\tau$ )                | $t=0.38$<br>$P=0.71$                          | $t=2.13$<br>$P=0.06$                         | $t=-0.09$<br>$P=0.93$                    | $t=-1.49$<br>$P=0.15$                  | $t=0.74$<br>$P=0.47$                         | $t=1.01$<br>$P=0.33$                      |
| Wing stroke<br>amplitude ( $\phi$ )        | $t=-0.38$<br>$P=0.71$                         | $t=0.15$<br>$P=0.89$                         | $t=0.21$<br>$P=0.84$                     | $t=1.11$<br>$P=0.28$                   | $t=-1.86$<br>$P=0.08$                        | $t=0.34$<br>$P=0.74$                      |
| Stroke plane<br>angle ( $\beta$ )          | $t=-0.11$<br>$P=0.91$                         | $t=0.80$<br>$P=0.44$                         | $t=0.68$<br>$P=0.51$                     | $t=-1.76$<br>$P=0.10$                  | $t=0.91$<br>$P=0.37$                         | $t=-0.41$<br>$P=0.69$                     |
| Angle of<br>attack ( $\alpha$ )            | Increase<br>$t=2.55$<br>$P<0.034$             | $t=2.12$<br>$P=0.06$                         | $t=0.63$<br>$P=0.54$                     | $t=-0.57$<br>$P=0.57$                  | $t=1.88$<br>$P=0.08$                         | $t=0.89$<br>$P=0.39$                      |
| $\alpha_1$                                 | $t=0.85$<br>$P=0.41$                          | $t=1.20$<br>$P=0.26$                         | $t=0.19$<br>$P=0.85$                     | Decrease<br>$t=-2.73$<br>$P<0.034$     | $t=1.03$<br>$P=0.32$                         | $t=-1.52$<br>$P=0.15$                     |
| $\alpha_2$                                 | $t=0.58$<br>$P=0.57$                          | $t=0.67$<br>$P=0.52$                         | $t=0.19$<br>$P=0.85$                     | $t=2.06$<br>$P=0.06$                   | $t=0.51$<br>$P=0.62$                         | Increase<br>$t=2.72$<br>$P<0.034$         |
| Wing camber                                | $t=2.18$<br>$P=0.04$                          | $t=1.31$<br>$P=0.22$                         | $t=1.35$<br>$P=0.19$                     | $t=2.15$<br>$P=0.05$                   | Increase<br>$t=3.08$<br>$P<0.01$             | $t=1.18$<br>$P=0.26$                      |
| Strouhal number ( $S$ )                    | $t=0.20$<br>$P=0.84$                          | $t=2.26$<br>$P=0.05$                         | $t=-0.57$<br>$P=0.58$                    | Increase<br>$t=4.01$<br>$P<0.001$      | $t=0.25$<br>$P=0.80$                         | $t=1.06$<br>$P=0.31$                      |
| Lift coefficient ( $C_L$ )                 | Increase<br>$t=5.32$<br>$P<0.0001$            | Increase<br>$t=2.98$<br>$P<0.034$            | Increase<br>$t=5.24$<br>$P<0.0001$       | $t=1.48$<br>$P=0.16$                   | Increase<br>$t=5.97$<br>$P<0.0001$           | Increase<br>$t=3.77$<br>$P<0.01$          |
